# Supplementary material for: Oleic acid from cancer-associated fibroblast promotes cancer cell stemness by stearoyl-CoA desaturase under glucose-deficient condition
Source: Springer Nature journal article supplement (doi:10.1186/s12935-022-02824-3), 2022-12-13

# Additional Figure. S1

Additional

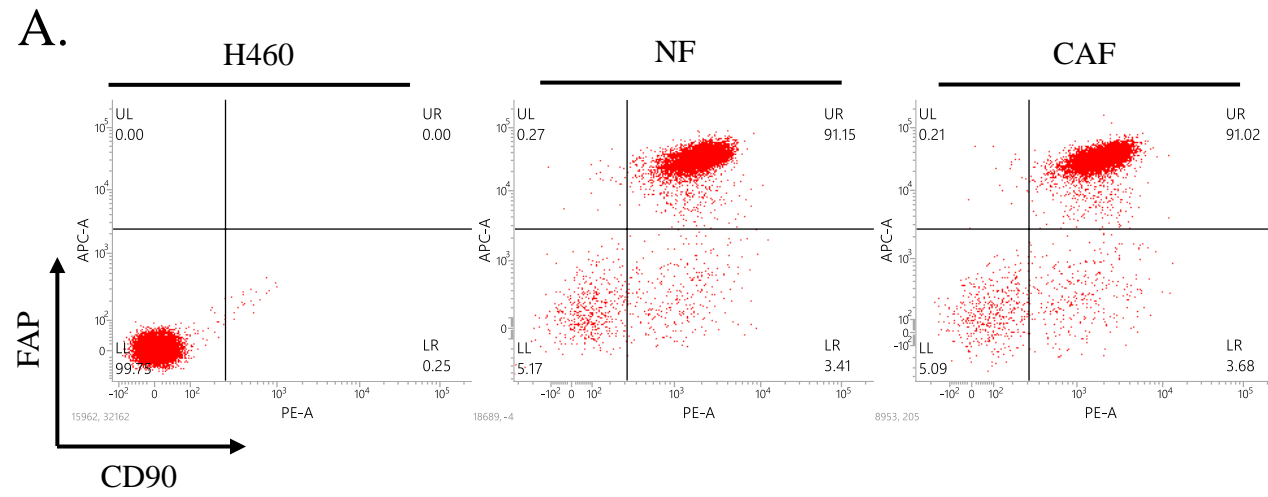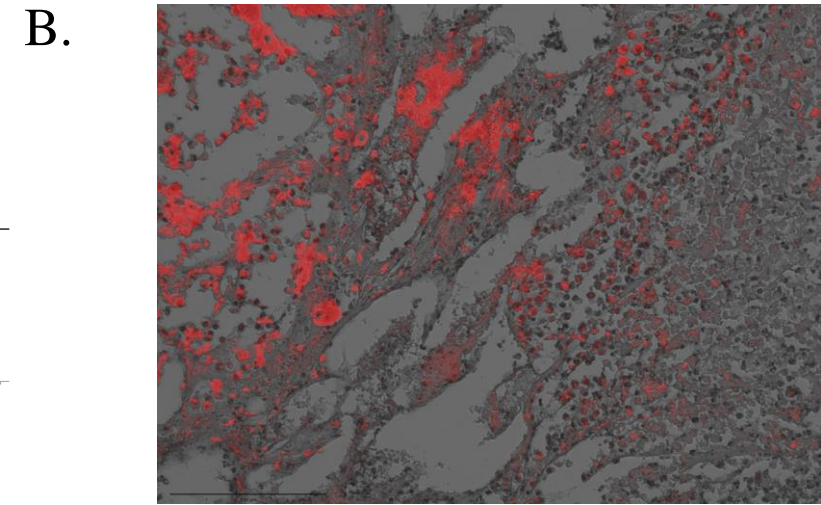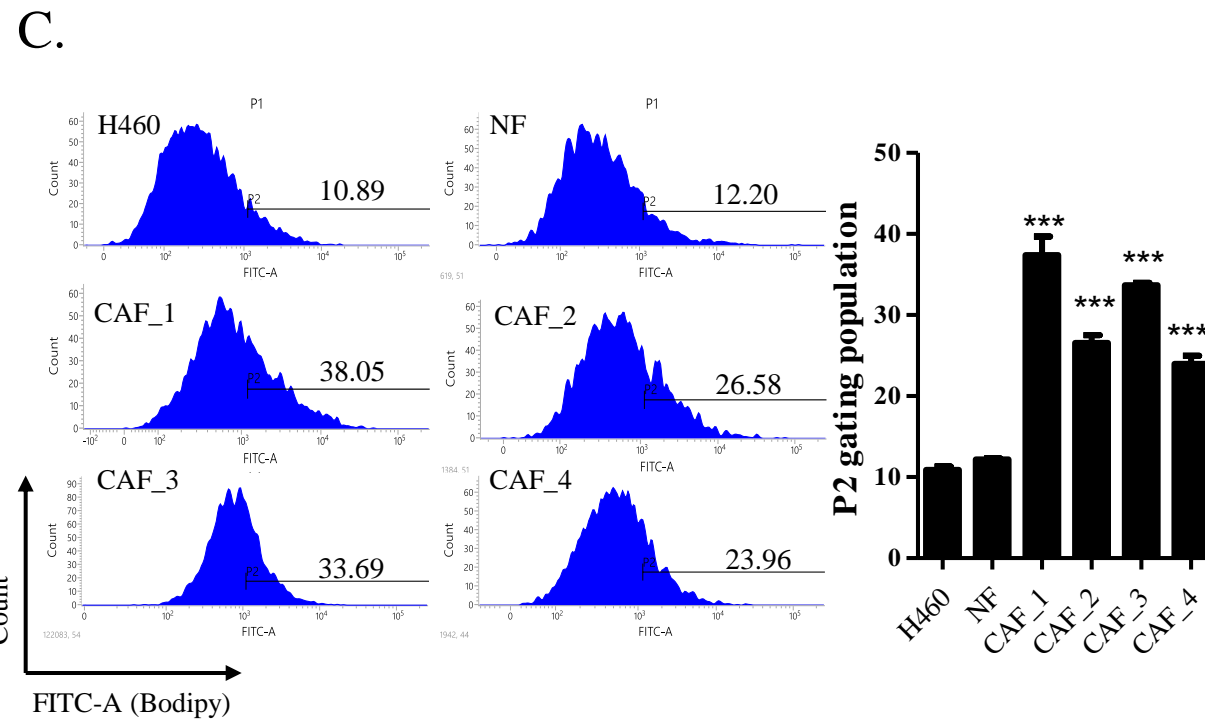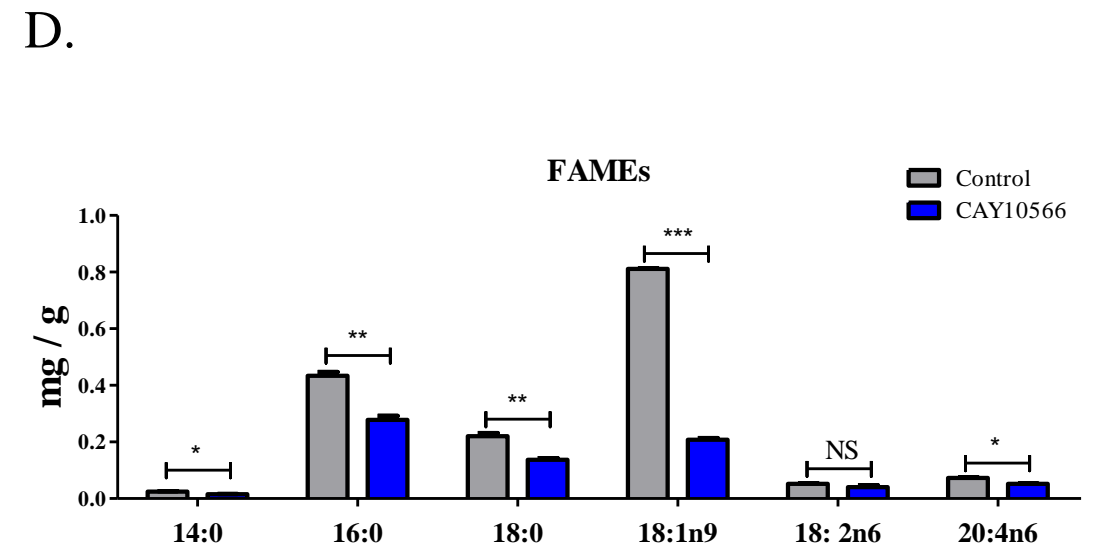

Additional

H460

E.

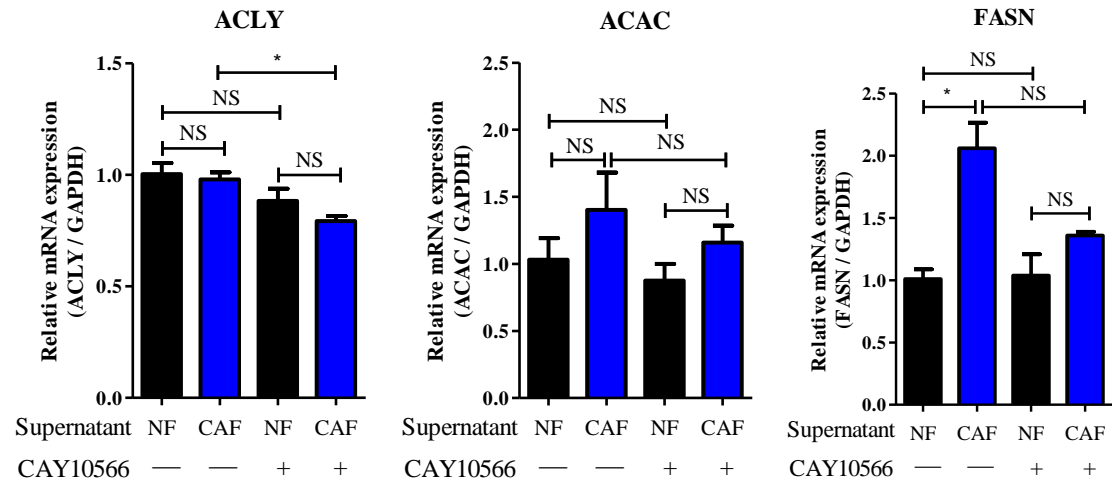

F.

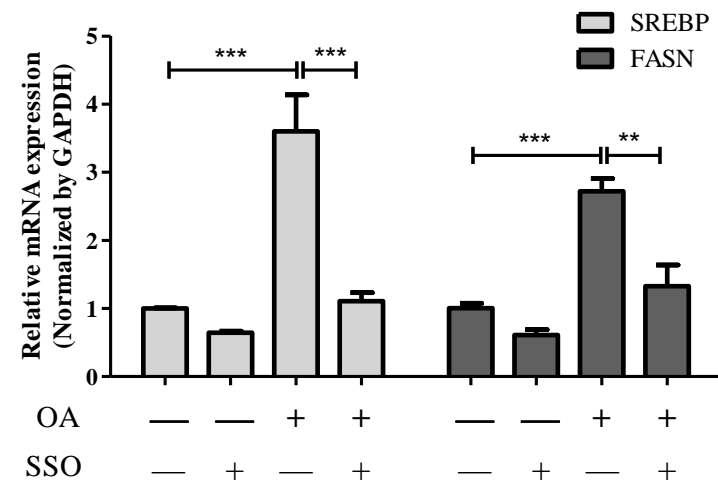

# Additional Figure. S2

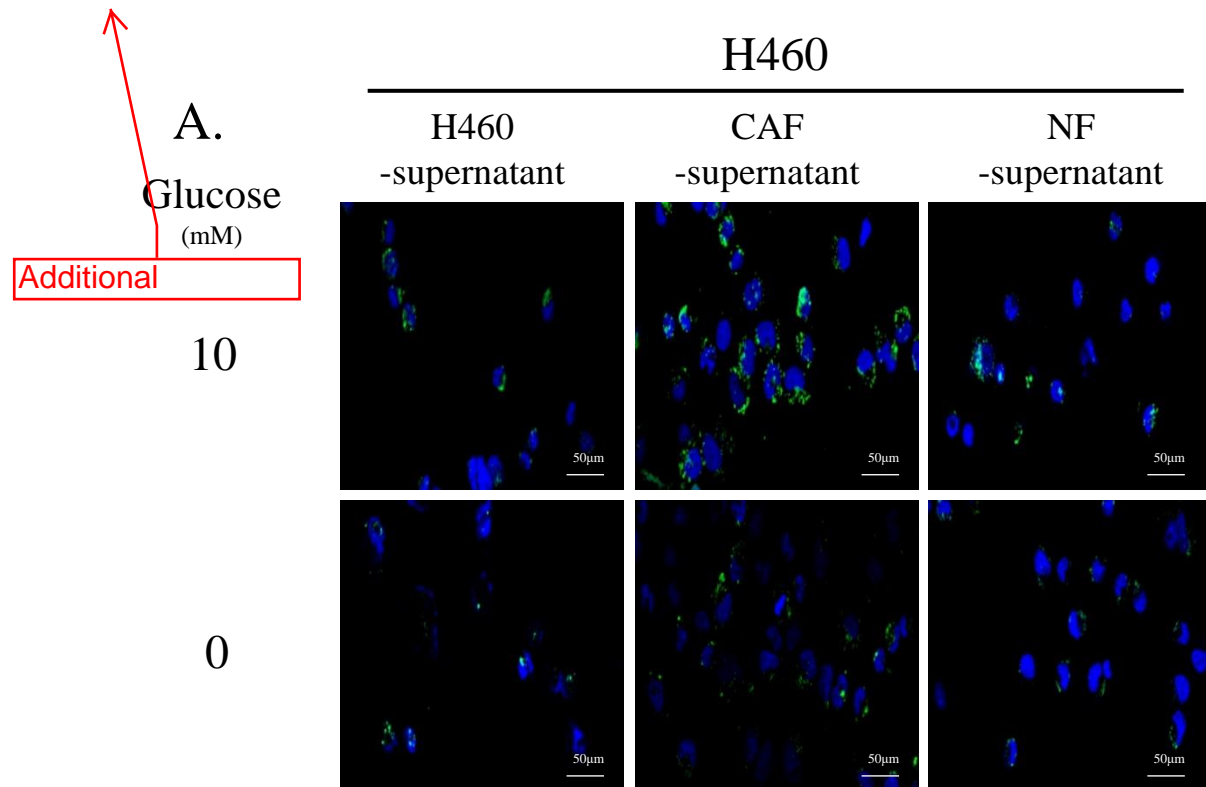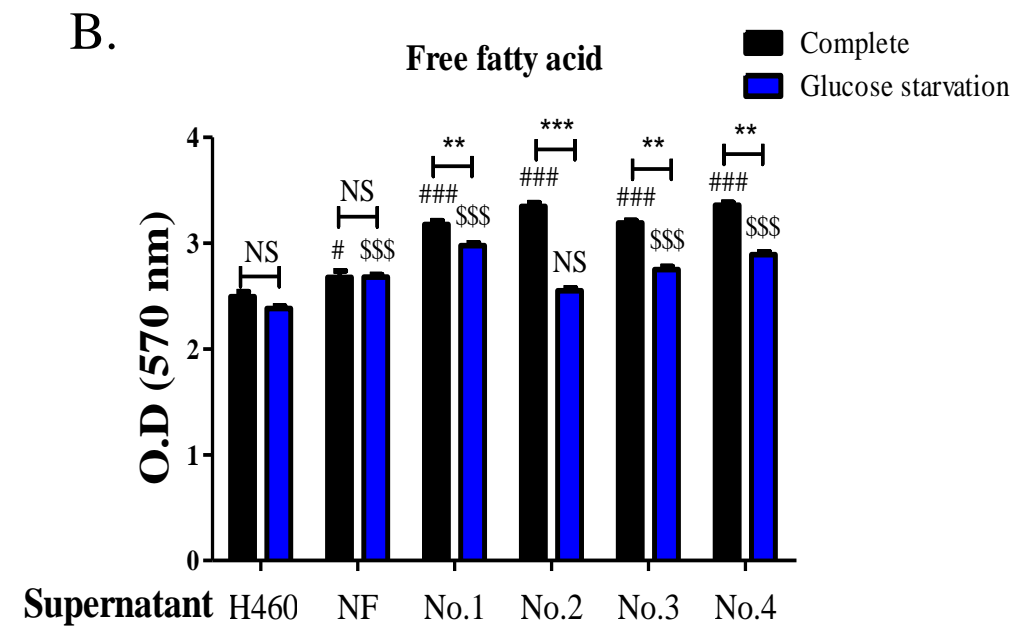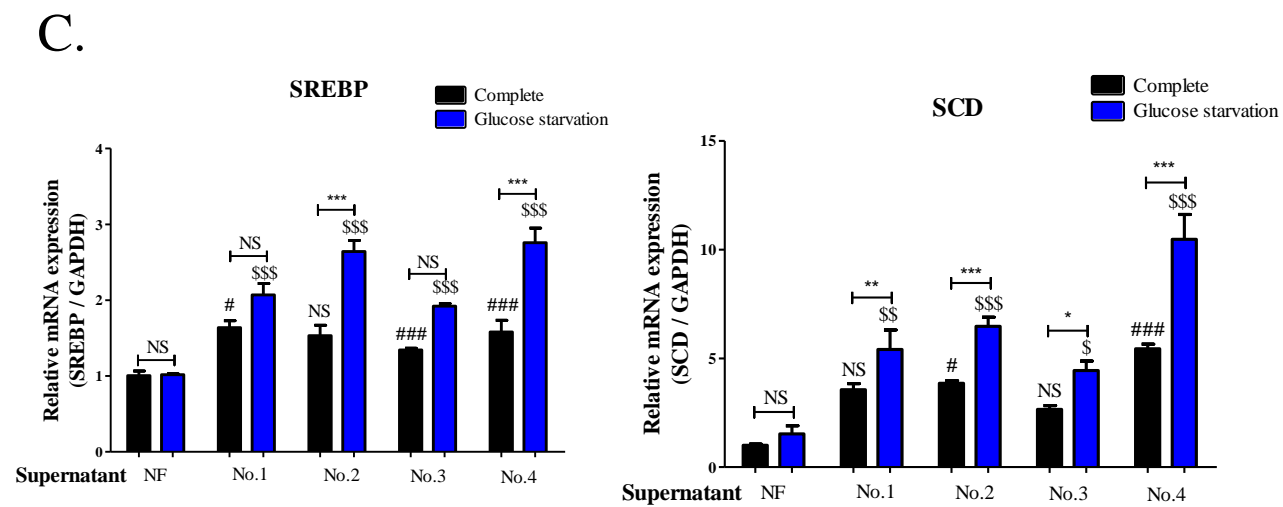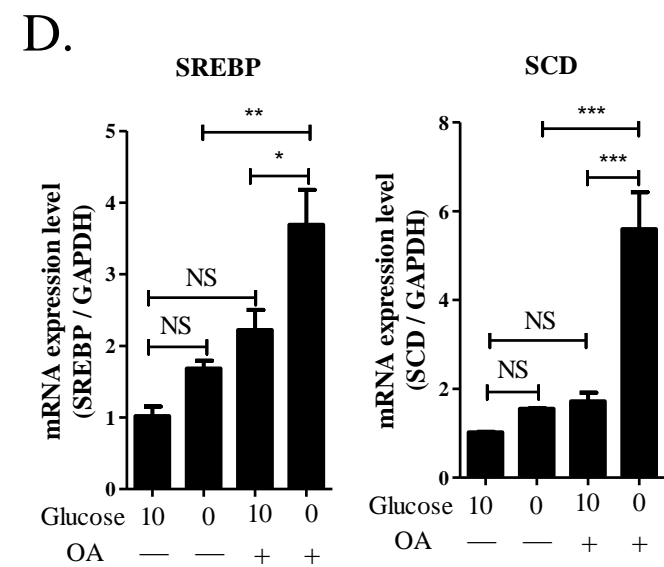

**Additional Figure. S2**

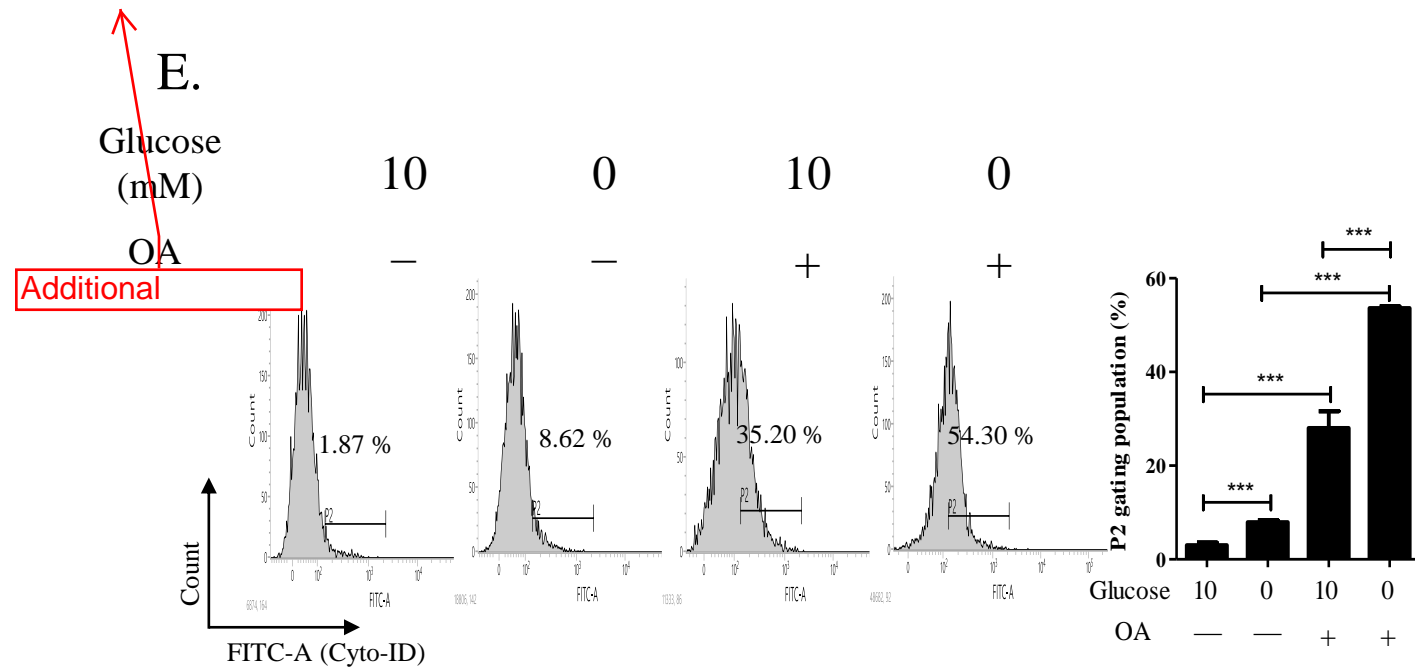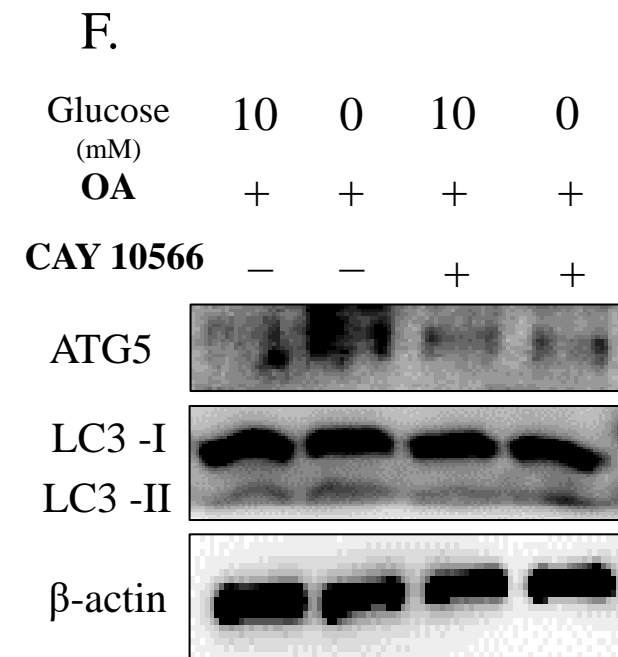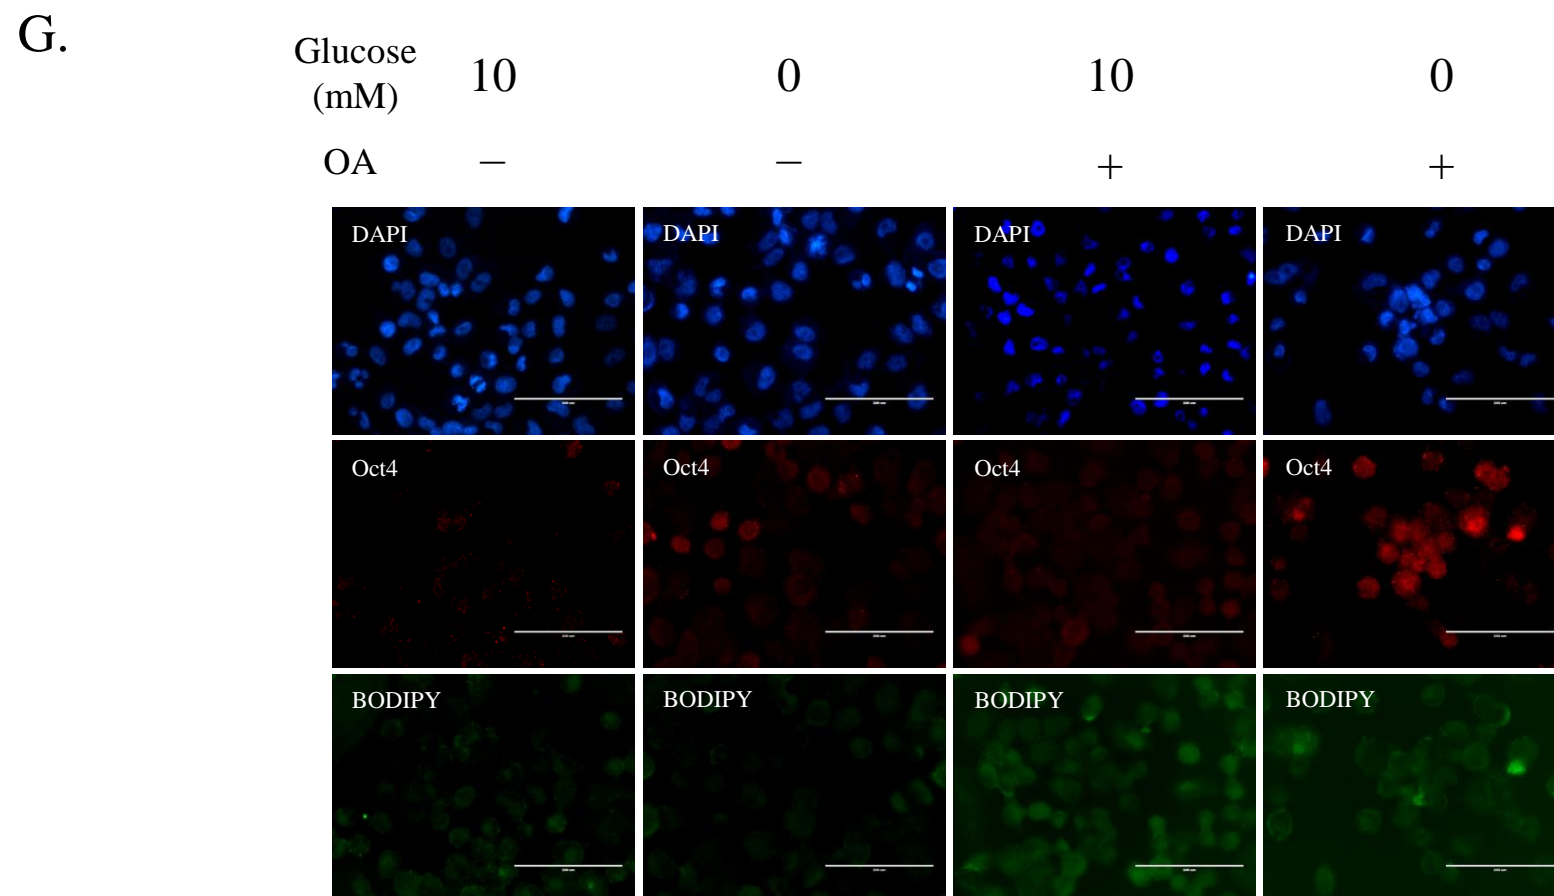

# Additional Figure. S3

Additional

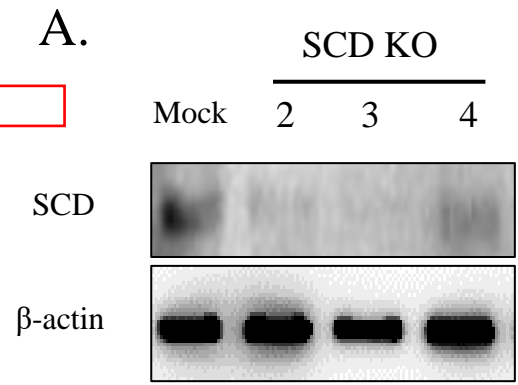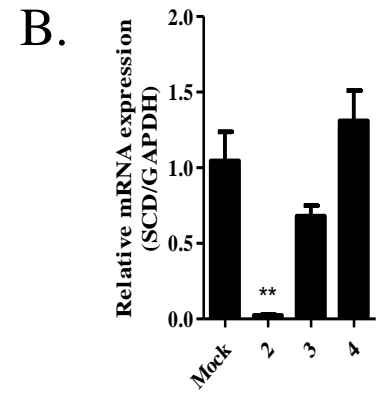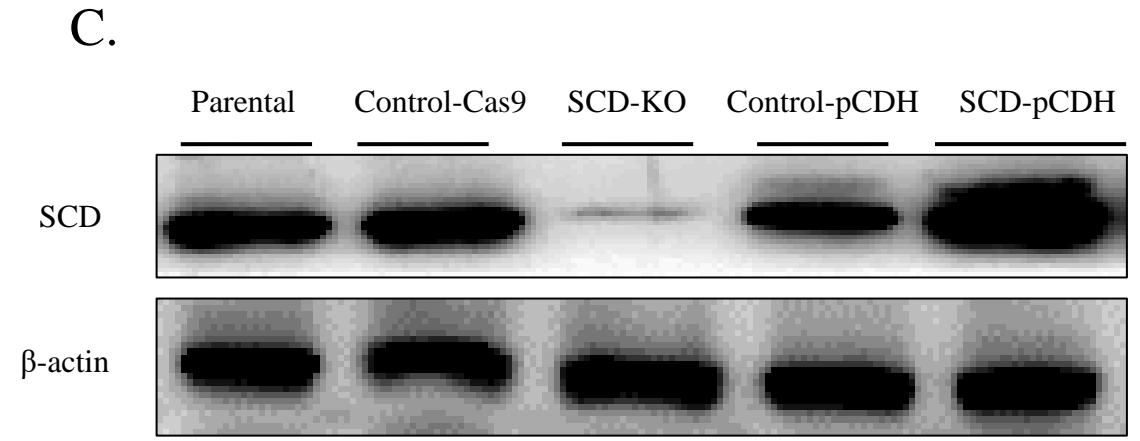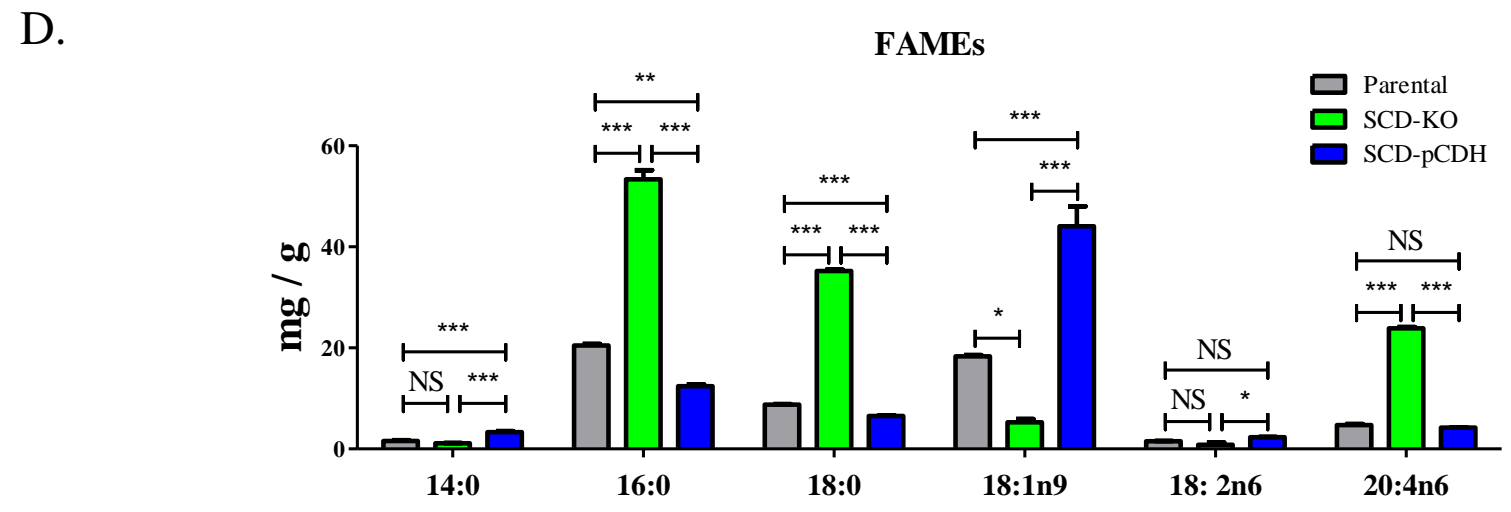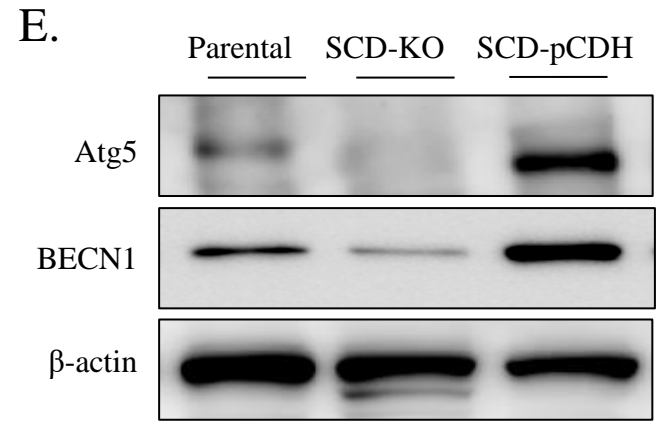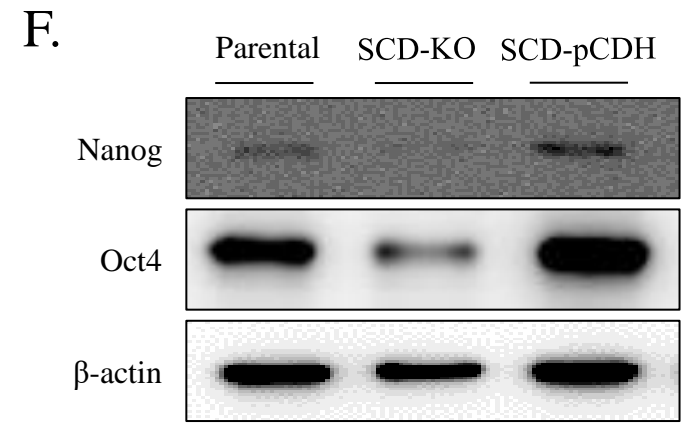

Additional Figure. S3

Additional

G.

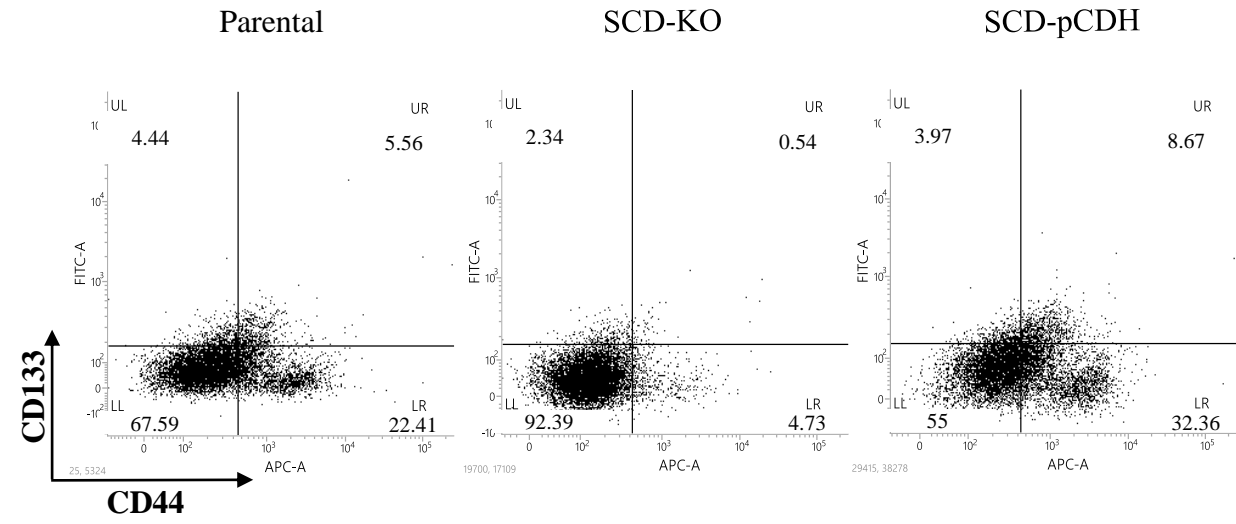

H.

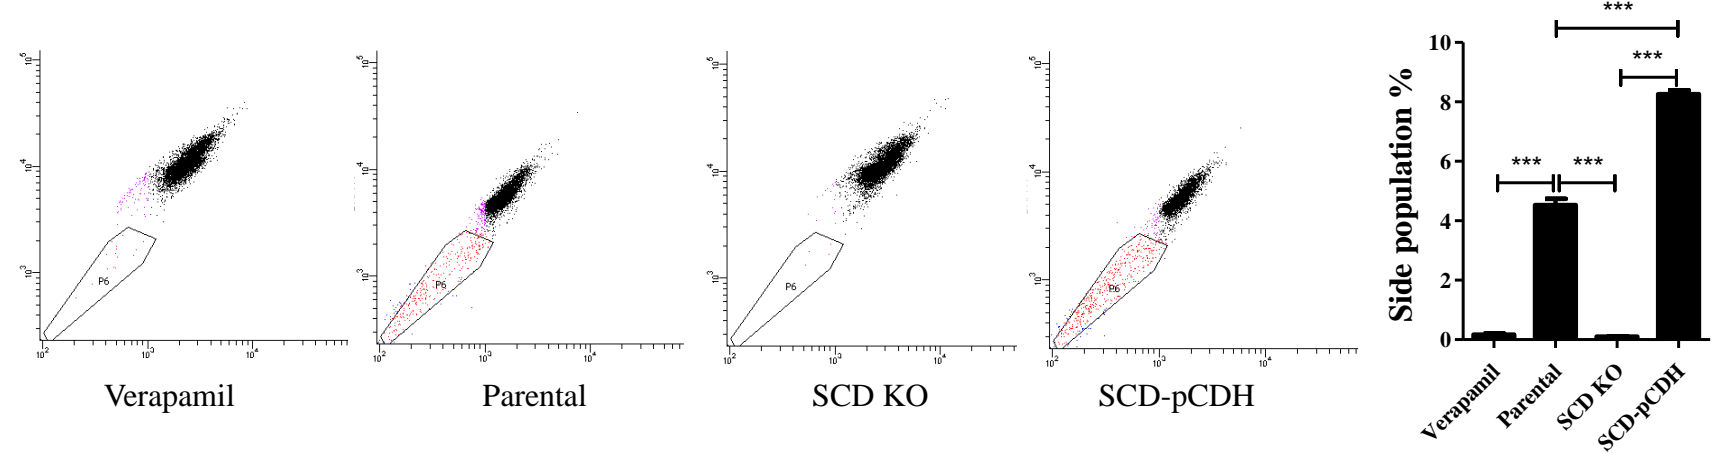

I.

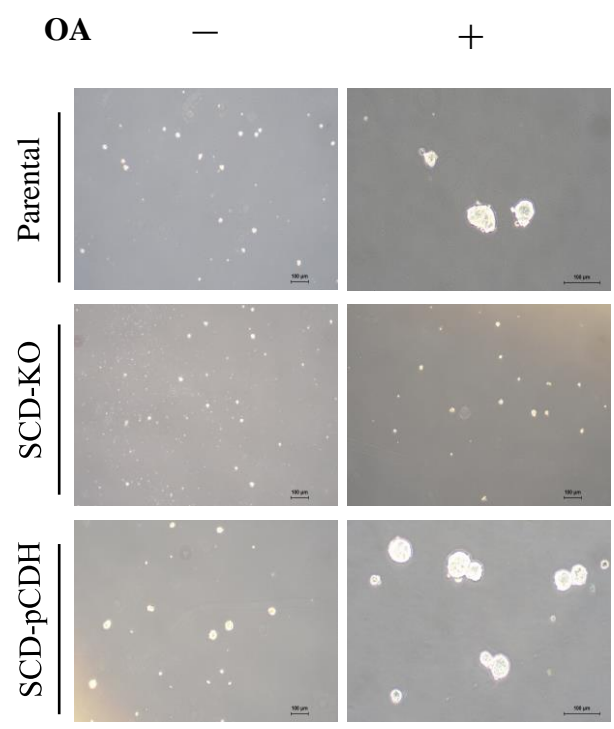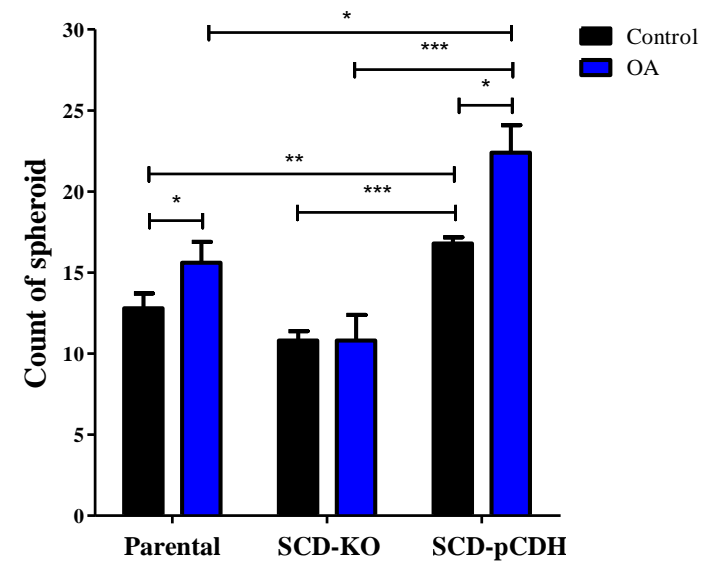

Additional

J.

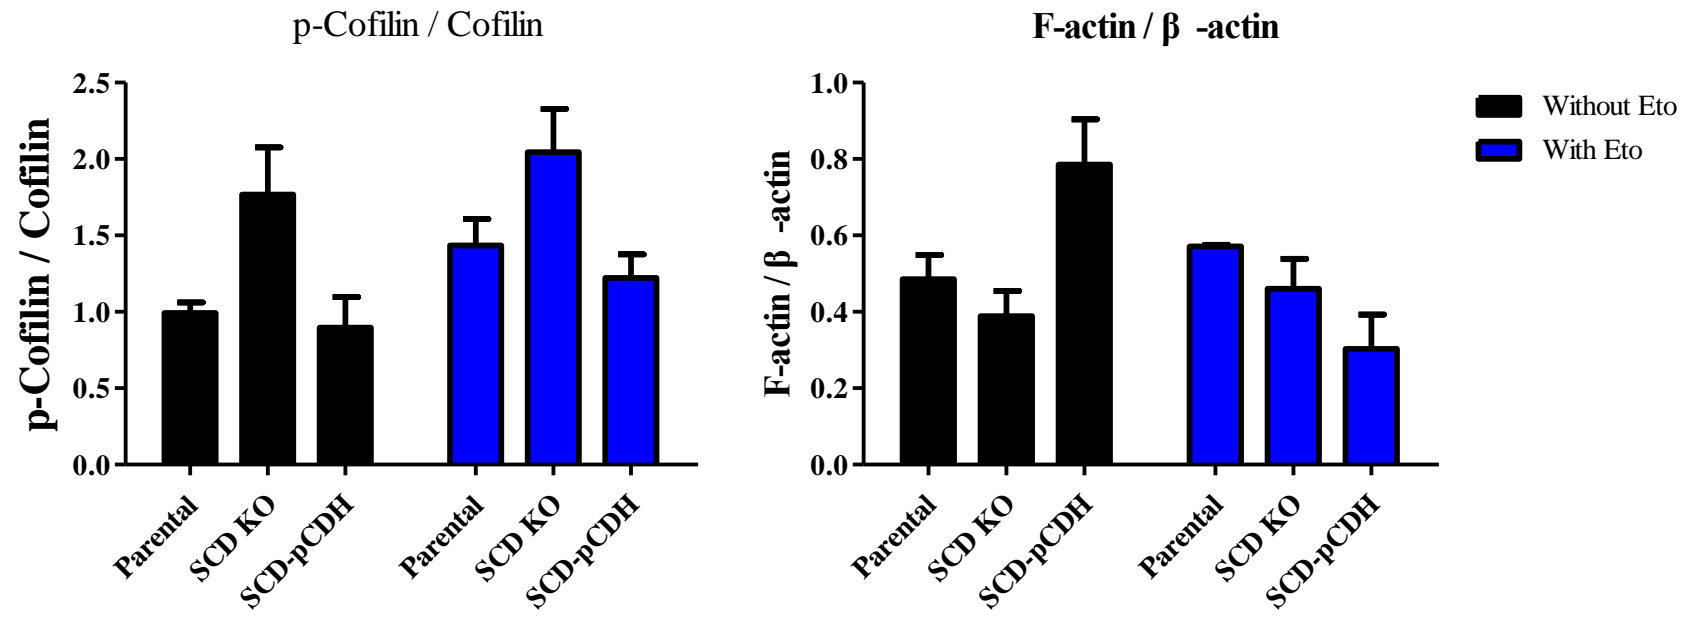

K.

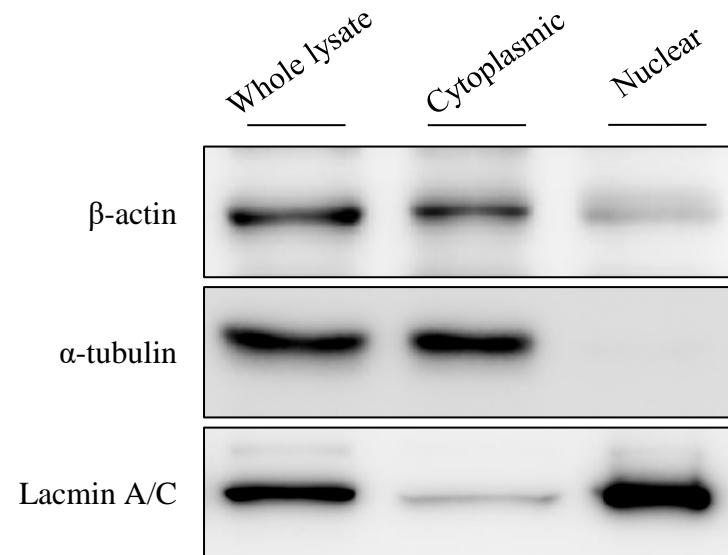

Additional Figure. S4

Additional

A.

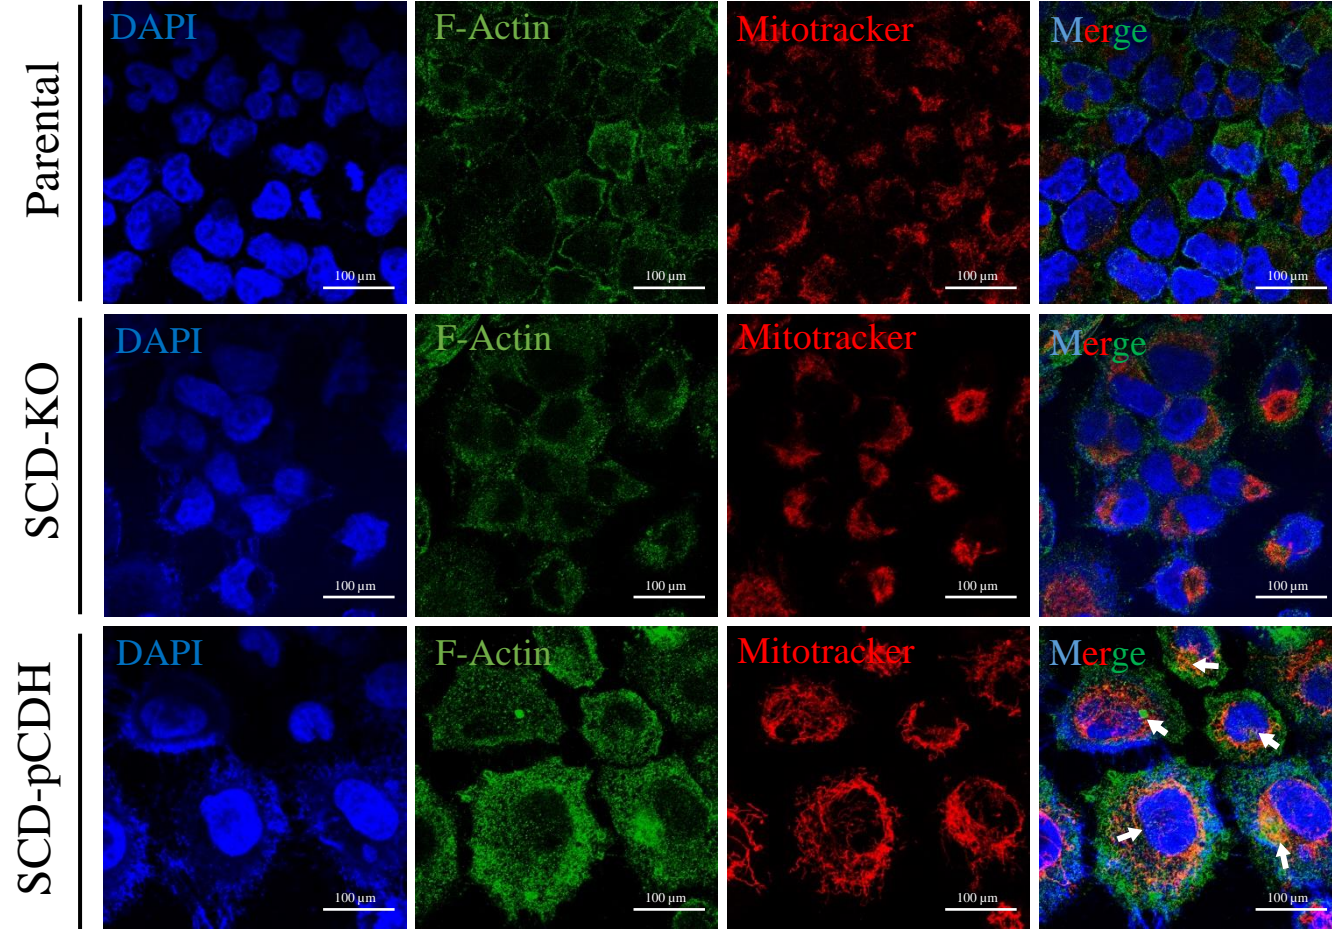



Additional Figure. S4

Additional

**B. MMP assay**

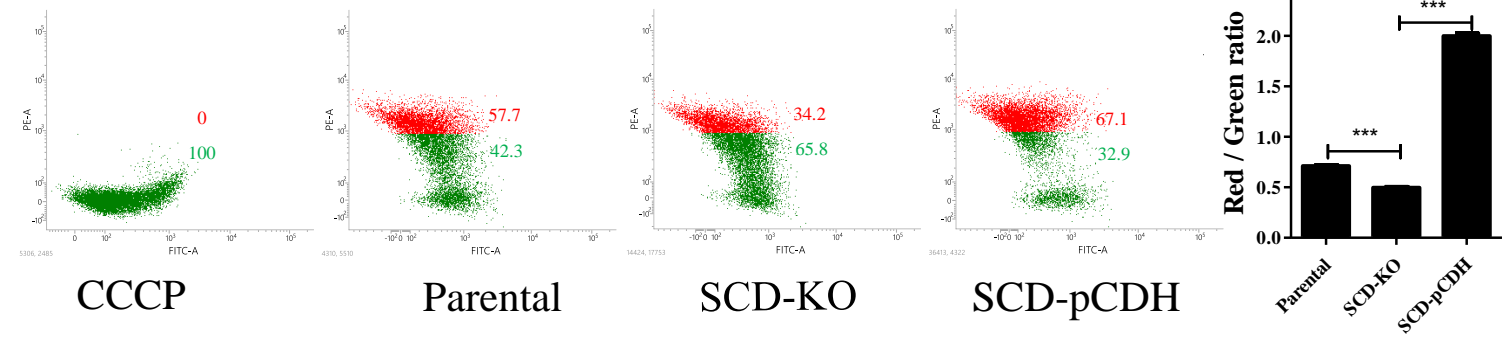

**C. Mitochondrial Calcium**

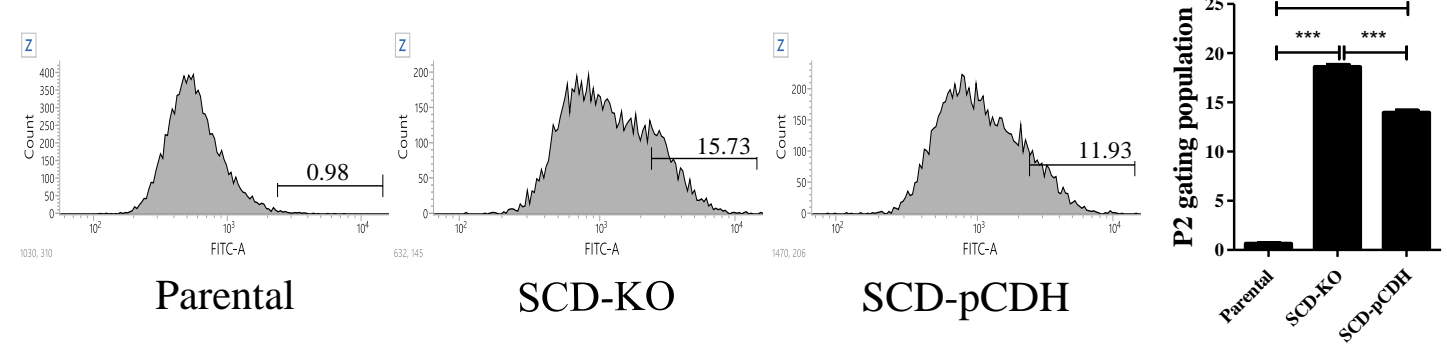

**D.**

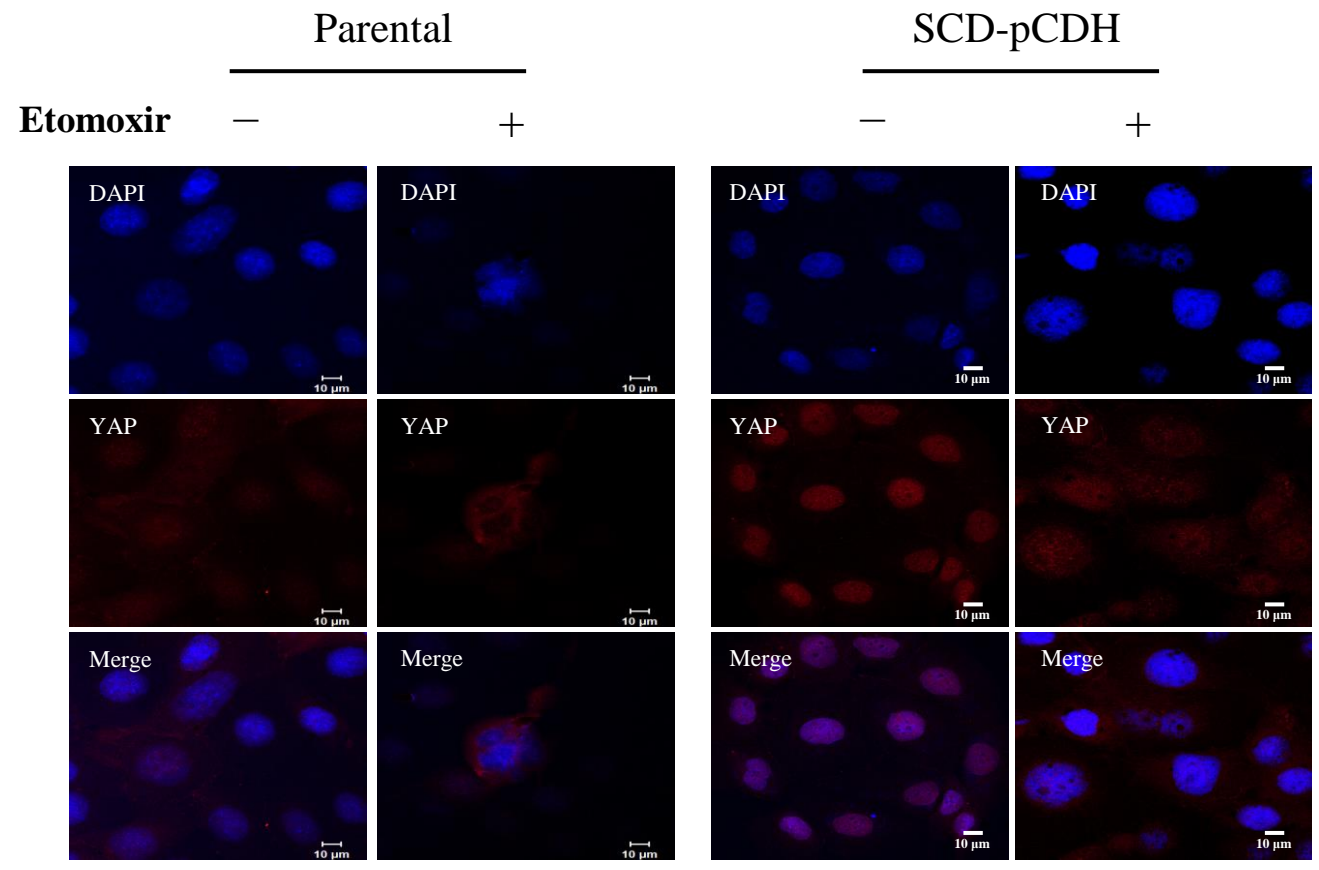

***Additional Figure. S5***

Additional

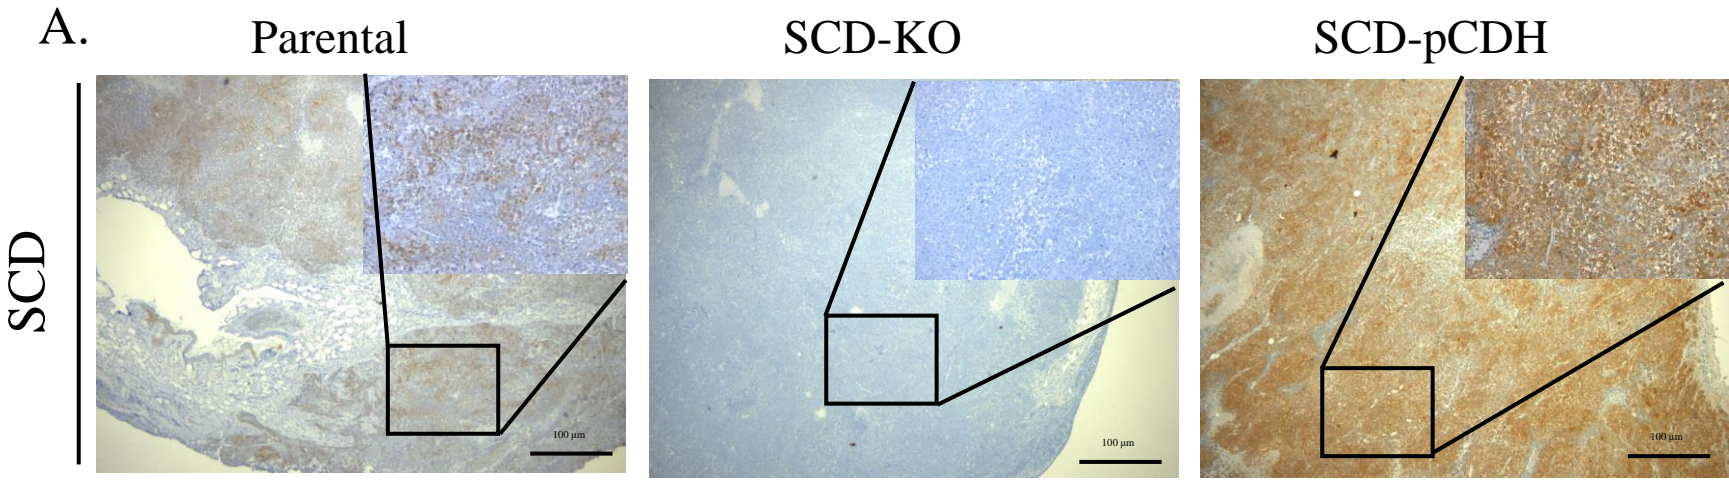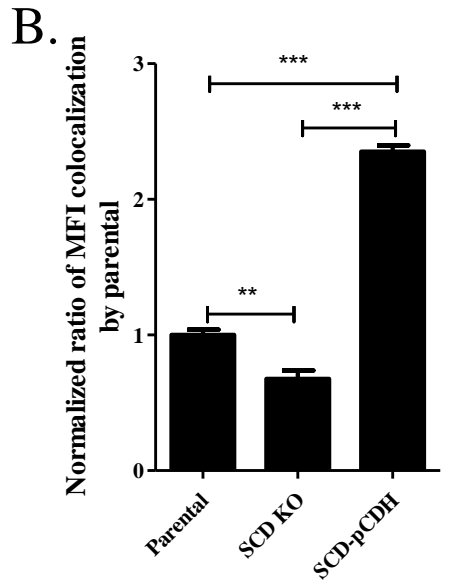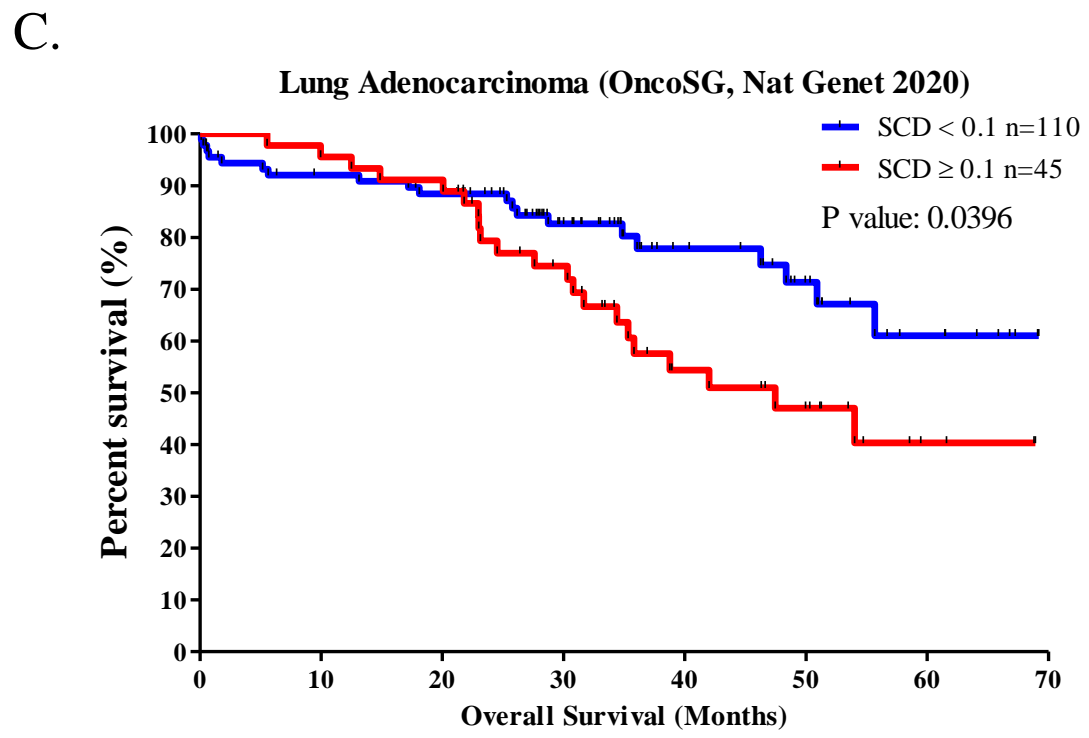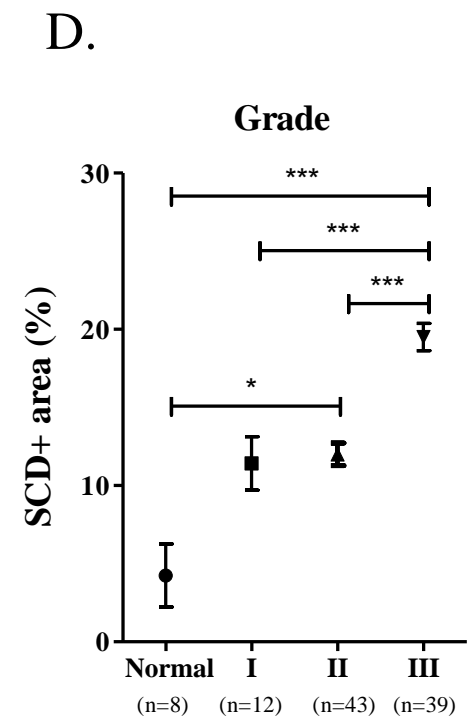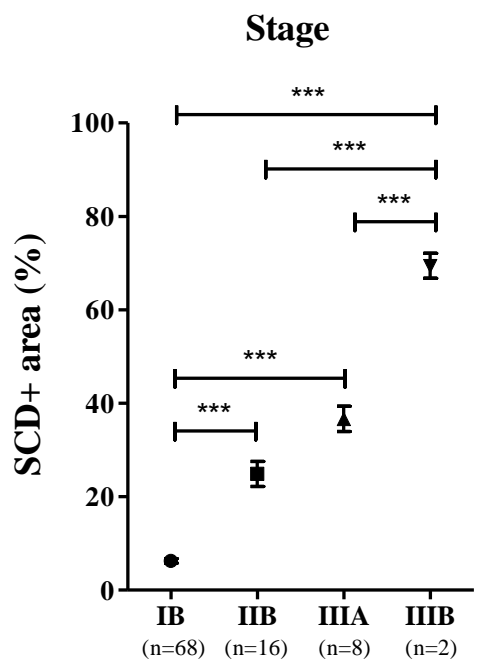

Supplement: MOESM1 [file 23821258]
